# Supplementary material for: Pol α-primase dependent nuclear localization of the mammalian CST complex
Source: PubMed Central journal article supplement (PMC7969954; doi:10.1038/s42003-021-01845-4), 2021-03-17
Supplement: 42003_2021_1845_MOESM1_ESM.pdf [file 42003_2021_1845_MOESM1_ESM.pdf]

**Pol  $\alpha$ -primase Dependent Nuclear Localization of the Mammalian CST Complex**

Joseph M Kelich, Harry Papaioannou, Emmanuel Skordalakes\*  
*The Wistar Institute, 3601 Spruce St, Philadelphia, PA 19104, USA.*

\*Correspondence and requests for materials should be addressed to Emmanuel Skordalakes  
([skorda@wistar.org](mailto:skorda@wistar.org)).

GGGGCTTTGGTGGCATTACGAGGAAGCCCTTCTCTGCTTGGCAAGATCAGGGAGACTGAAAGATGC  
TTAGAAGTCATCCACCAGGCGGGCTGTGTTTGGAGTTCTGAGCTCTGCTACCCCATCCATCTCAAGG  
CCTGCGGGATGCCGGACAGGATGTCACTTAGGAGGGAGACGGAGGCTGGGCGCGGTGGCTCCCG  
CCTGTAATCCGAGCACTTTGGGAGCCCGAGGCGGGCAGATCGCTTGAAGCCAGGAGTTTCGAGACC  
AGTCTGGGCAACATGGCGAAACCATGTCGCTACAGAAAAATACAAAAATTAGCCGGGTGTGGCGGT  
CCAAGCCTCGCATCCCAGCTACTTGGTGGGCTGAGGTGGGAGGATCGCTTGAAGCCCGGAGGTCG  
AGGCTGCAGTGAACCGAGATGGCGCCGCTGCACTCCAGCCTGGGCGATAGAGCCGAGACCTCGTCT  
CAAAAAATCAGAGAGGGCCAGGGGCTGTGTTTTACGCCTGTAATCCCAGCACTTTGGGAGGCTGA  
GGCGGGTGGATCACCTGAGGTCAGGAGTTTGAAGCCAGCCTGGCCACATGGTAAAACCCCGTCTCT  
ACTAAAAATACAAAAAATAGCCGGGCGTGGTGGTGGCAGGTGCCTGTAA  
TCCTAGCTACTCAGGAGGCTGAGGCCGAAAATCCCTTGAACCTGGGAGGCGGGGTTGCAGTGA  
GCCGAGATCGCGCCACTGCACTCCAGCCTGGGCGACAGAACCAGGCTTCGTCTTAAAAA  
ATCAGAGAAAAGAGACAGGGGTGTCGGGAGTTGGGATGGTGCACCGAGGCGCCTCGCGGAGTCTC  
TAGGAAGCGAGGGGGTGAAGCAGCGAGAAGGAGCTGGAGGTGGCGAGGAAACCCGCTCACCGGTG  
ACGTCACCGAGCGCCCCCACCCCATCCCCACCCCAAGCGAGCACCTGCCCTCCCGGGGGC  
GGAGCTCCGGCGCATCATGgtgagcaagggcgaggaggataacatggccatcatcaaggagttcatgcgctcaagggtgacatg  
gagggctccgtgaacggccaaggttcgagatcgagggcgagggcgagggcgccctacgagggcaccagaccgccaagctgaagggtg  
accaaggggtgccccctgccctcgctgggacatcctgtccctcagttcatgtacggctccaagggctacgtgaagcaccgcccgcacatcccc  
gactactgaagctgtcctccccgagggctcaagtgaggcgcgtgatgaactcgaggacggcggcggtgacccgtgaccaggactcctcc  
ctgcaggacggcgagttcatctacaaggtgaagctgagcggcaccactccctccgacggccccgtaatgcagaagaagaccatgggtggg  
aggcctcctcgagcggatgtaccccgaggacggcgcctgaagggcgagatcaagcagaggctgaagctgaaggacggcggccactcga  
cgtgaggtcaagaccacctacaaggccaagaagcccgtgagctgcccggcctacaacgtcaacatcaagttggacatcacctcccacaa  
cgaggactacaccatcgtggaacagtacgaacgcgcccgagggccgactccaccggcgatggacgagctgtacaagGtGGtGGtG  
GtAGTGC GGCTGGCCGGGCCAGGTCCCTTCCTCCGTGAGTGCTGCTATTACGTCTCTTGTTCCTTT  
TTTCTTGTGTGTCACAGATACTCTTCTCTTCTATTTCTCTGCTTGTCTCTCTGGGCTCGCTGGCC  
GCGTCCGGCCCATGGGTGAGGGGGTTGTGAGTCGGTCCGCTCCTACCTCTTACTGGTTCTGCGAAT  
GTTTATTCCCTCATTACGCGGCGCCCGCTGTGAGCCTTAAACTGGTCTCCGTTCACTCTCTAGGGT  
TTAATCCTGGTGGAAACCAGGAGCAGGTTAATGGGGAACTATGGGGCTGTGGGTTCTGGAGAA  
GACCCTTGACGGAGCTGTAGGGGAAAAGGGCAACCATAATAAGTAAAAGCGTCTGAGACCCGAAGT  
GCGTGTAGAAGGCAAAAAGCGCCGAAAGGGGCTGGGTGTGGTGGCTCACGCTTGTAAATCCAGCACT  
GTGGGAGGCGGAGGCGGGCGGATTACTTGAAGTTCAGGAGTTCGAGACCAGCCTGACCAACATGGT  
GAAACCTCATCTCTACTAAAAACAAAAAATTAGCCGGGCGTGGTGGCGCGCACCTGTAATTCCAGC  
TACTCAGAAGGTTGAGGCAGGAGAATCGCTTGAACCGGGTAGACGGAGGCTGCAGTGAGCTGAGAT  
TGTGCCACAGCACTCCAGCCTGGGCAACAGAGCGAGACTCTGTCAAAAAAAAAAAAAAAAAAAAA  
AGCGCCGGAAGGGGTTTCAGGACGGAAGCAACACATATTCAAAGGCAGGAGGATAGAGCAGGTGT  
CTGAAAAACTCAAAAGTTTCAGTTGGGTGGTGGTGGAGGGGTGAGAGCTGACAGTTTTGTACCTTTG  
CTAAGCAGCGACTTTAACATGAGGGTAATTGGGTGTGGTGGCACACGCCGTAATCCCAGCTGCTC  
AGGAAGCTGAGCAGGGAACCACGGAAGTGGAGGTTGCAGTGAGCCGAGATCGCGCCACTGCACTC  
TAGCCTGGACGACAGAGCCAGA

Red = mCherry  
Yellow = Linker  
Black = CTC1 gene

**Supplementary Fig. 1.** HDR Template sequence for CRISPR Cas9 mCherry knock-in at the CTC1 locus.



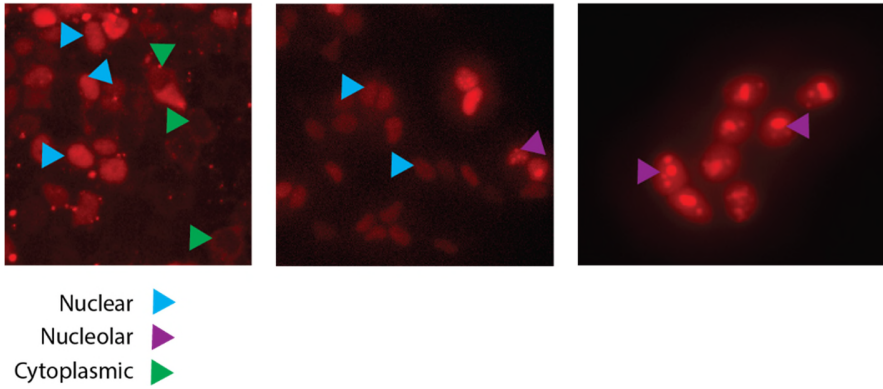

**Supplementary Fig. 3.** mCherry-CTC1 localization in a second mCherry-CTC1 knock-in clone. Widefield epifluorescence imaging of cells derived from a single parental clone show nuclear, cytoplasmic, and nucleolar localization for mCherry-CTC1.

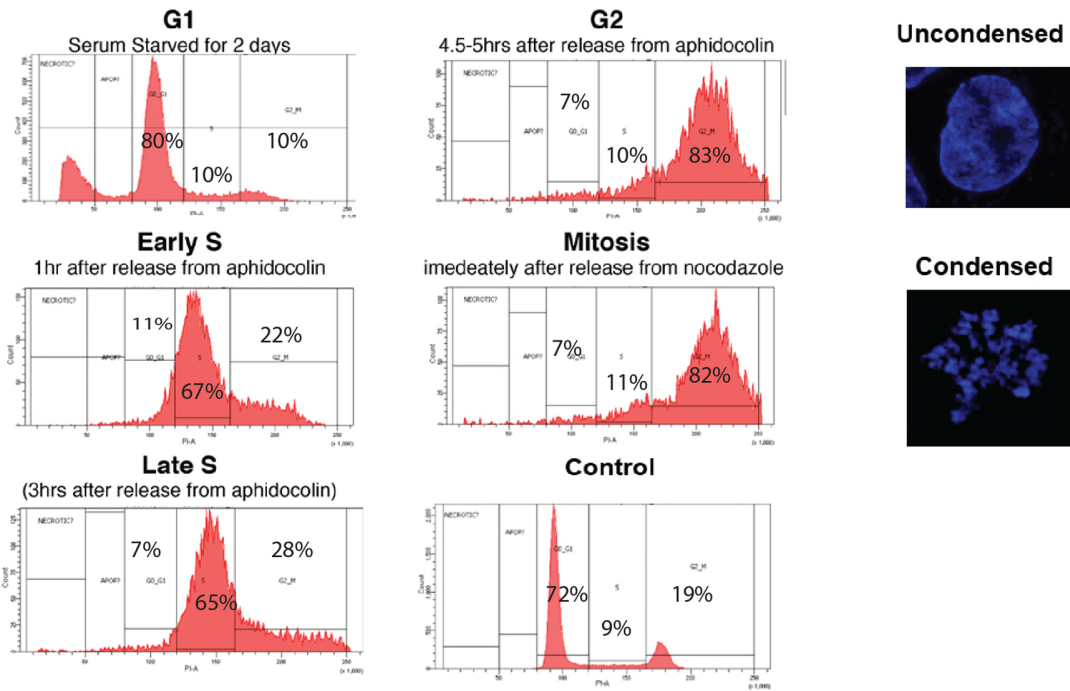

**Supplementary Fig. 4.** Cell cycle synchronization of mCherry-CTC1 HEK293T cells. Serum starvation, aphidicolin and nocodazole were employed to synchronize cell in the various cell cycle stages. Propidium Iodide flow cytometry was utilized to determine respective cell cycle staging. Condensation of chromatin as shown in blue was further utilized to distinguish G2 from Mitotic cells. No necrotic or dying cells were included in further analysis.

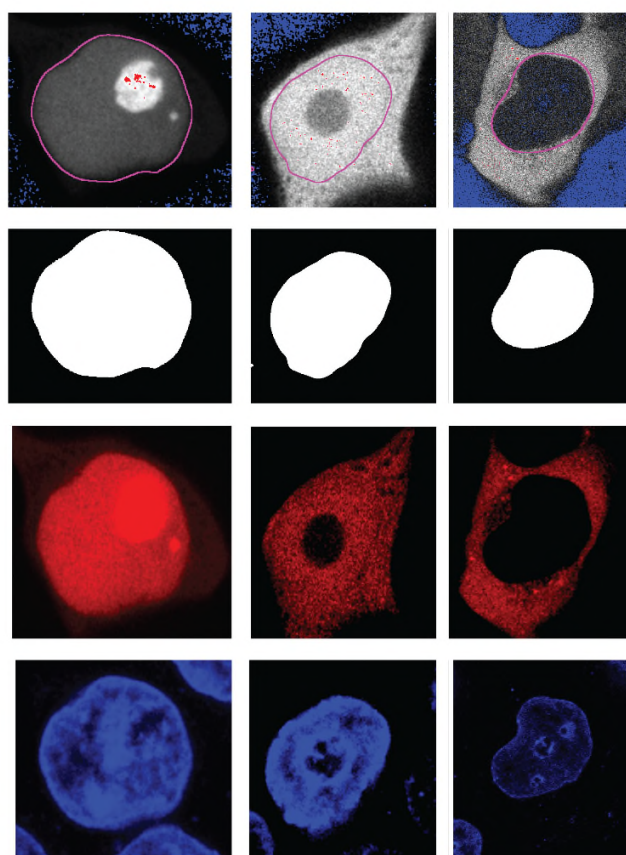

| icn factor | % nuclei | % cytoplasm | av. nuclei intensity | av. cytoplasm intensity |
|------------|----------|-------------|----------------------|-------------------------|
| 7.2262     | 87.8438  | 12.1562     | 898.9886             | 87.3536                 |
| 2.4105     | 70.6789  | 29.3211     | 101.8499             | 80.2793                 |
| 0.2256     | 18.41    | 81.59       | 544.6233             | 1214.2913               |

**Supplementary Fig. 5.** Quantification method for Nuclear/Cytoplasmic ratio.

Nuclear/cytoplasmic ratios were calculated using the ImageJ plugin

Intensity\_Ratio\_Nuclei\_Cytoplasm.ijm<sup>1,2</sup>. Three cells showing drastically different localizations for mCherry-CTC1 are shown with corresponding percentages in the nucleus and cytoplasm.

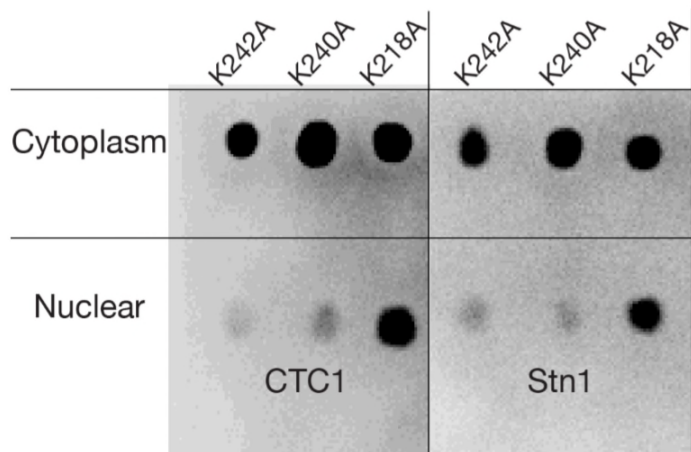

**Supplementary Fig. 6.** Mutant CTC1 constructs also inhibit nuclear import of STN1. Cell lysate fractionation was employed to split mCherry-CTC1 mutant HEK293T samples into cytoplasmic and nuclear fractions. K242A and K240A significantly diminish nuclear STN1 and CTC1 while K218A does not.

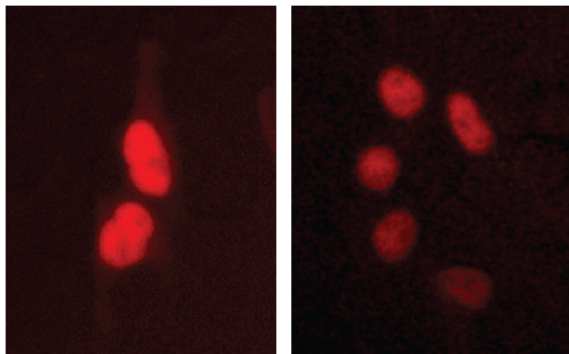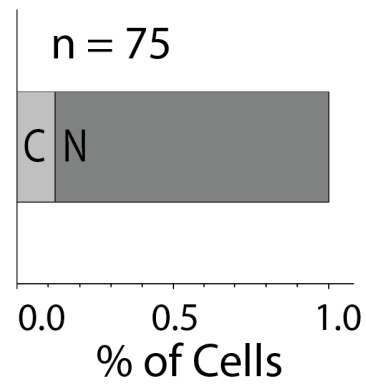

**Supplementary Fig. 7.** CTC1 Lysine 1164 is not critical to nuclear localization of CTC1. Lysine 1164 was mutated to an alanine on an mCherry-CTC1 expression plasmid and transfected into CTC1 knockdown cells. Fluorescence microscopy performed 48 hours later displays no inhibition of nuclear localization.



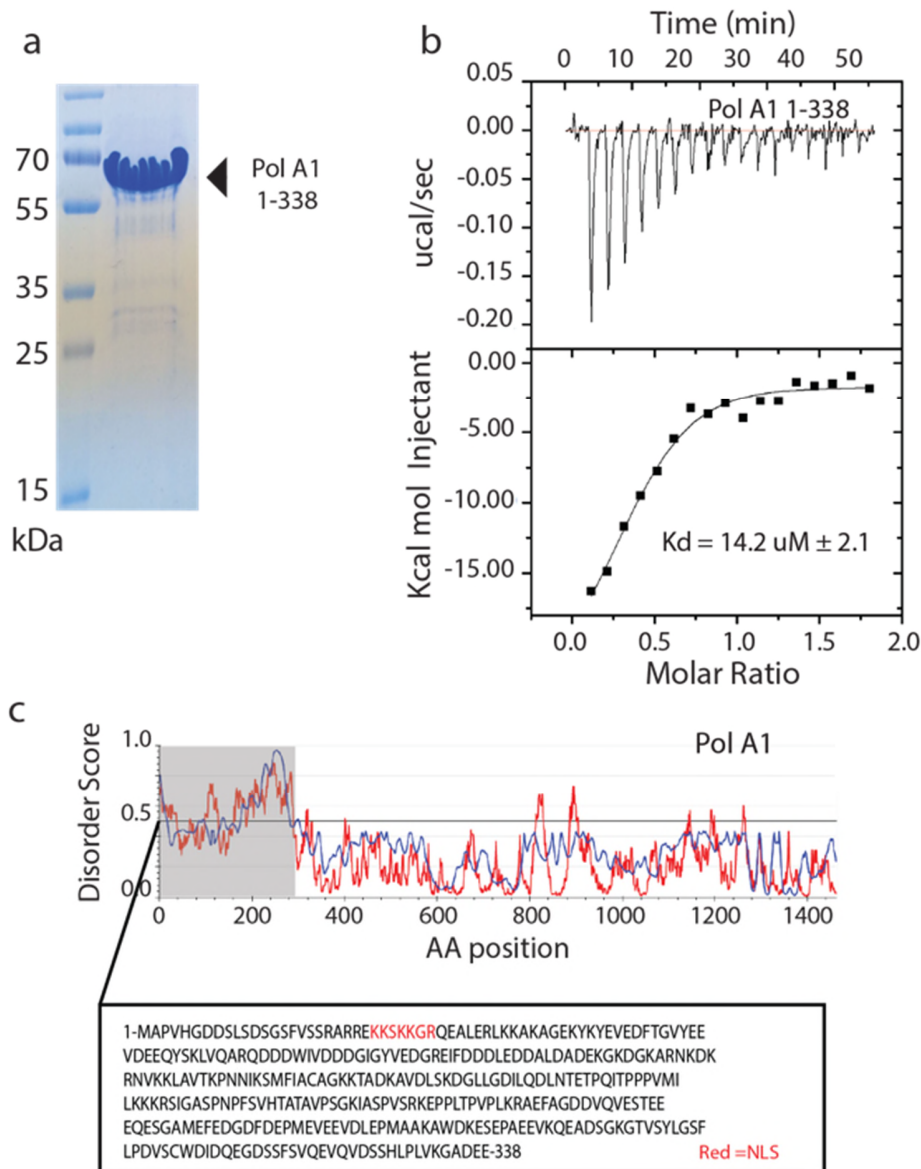

**Supplementary Fig. 8.** N-terminal tail of Pol A1 binds to importin  $\alpha$  in vitro. **a.** SDS-PAGE analysis shows purified Pol A1 (1-338). **b.** ITC binding curve shows that importin  $\alpha$  binds to Pol A1 with micromolar affinity. **c.** Disorder plot highlights how the N-terminus of Pol A1 is disordered. Values above 0.5 are deemed likely to be disordered.

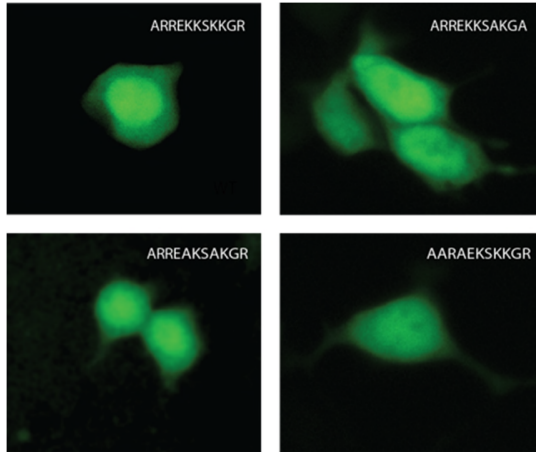

**Supplementary Fig. 9.** GFP-Pol A1 NLS mutants do not significantly affect Pol A1 nuclear localization. Widefield epifluorescence images were taken of GFP-Pol A1. Top left panel represents GFP-Pol A1 containing the wild type putative N-terminal NLS. Three other mutants are shown all with a localization within the nucleus.

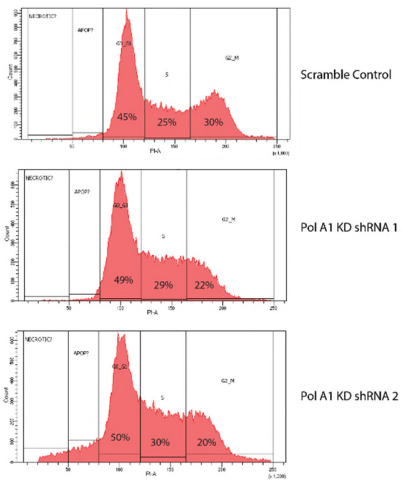

**Supplementary Fig. 10.** Pol A1 knockdown results in minor cell cycle defects in HEK293T cells. Propidium Iodide cell cycle analysis shows increase in G1 and S phases for Pol A1 knockdown cells compared to non-targeting control shRNAs.

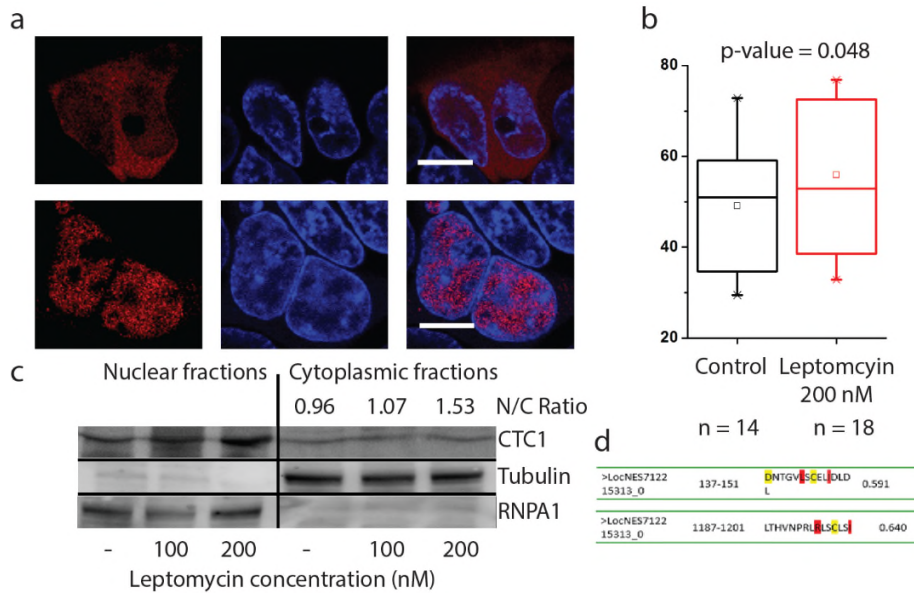

**Supplementary Fig. 11.** Leptomycin B treatment of mCherry-CTC1 cells. **a.** Confocal images showing daughter cells at the end of telophase for both control and leptomycin treated cells. Scale bar is ~5  $\mu$ m. More CTC1 is witnessed within the nucleus of the new daughter cells for leptomycin treated cells compared to control. **b.** Quantification of Nuclear/Cytoplasmic ratio of cells imaged through confocal microscopy shows a modest increase in nuclear CTC1. **c.** Nuclear/cytoplasmic fractionating western blots are shown for wild type HEK293T cells treated with leptomycin at varying concentrations. An increase in nuclear fraction of CTC1 is seen with increasing Leptomycin B concentration. **d.** Locnes was utilized to identify two potential nuclear export signals (NES) within CTC1<sup>3</sup>. Red indicates high conservation, yellow indicates minor conservation in amino acid residue composition between mammals.

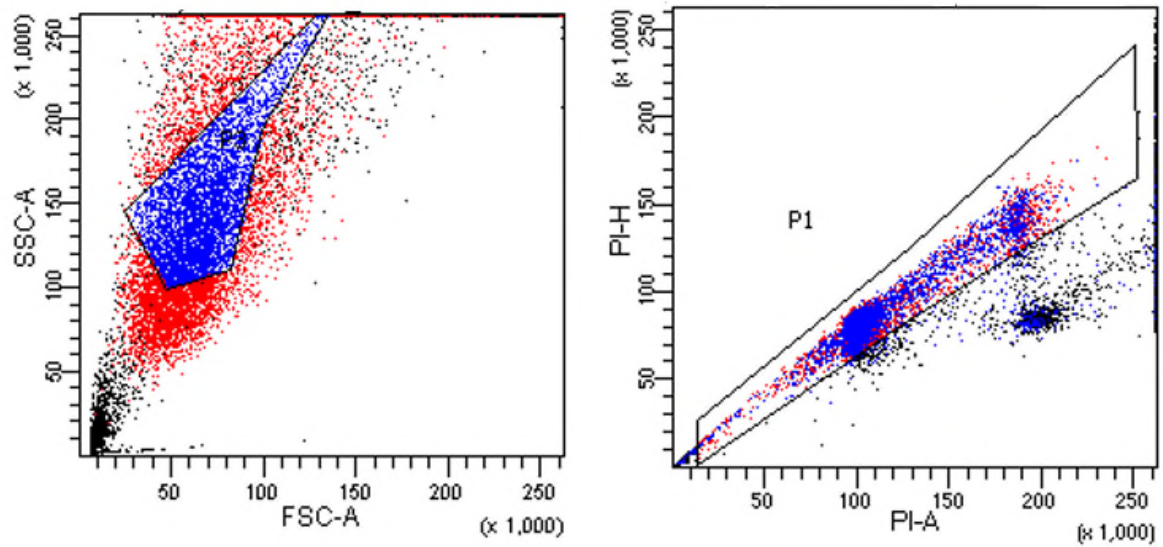

**Supplementary Fig. 12.** Flow cytometer gating example. A sample gating of cells is shown. All experiments used the same gating scheme. Cells deemed apoptotic/necrotic were excluded from analysis. mCherry expressing cells were deemed to be over 80% for mCherry based sorts and this number reaches 100% for propidium Iodide stained cells. >10,000 cells were used for all plots shown in the manuscript.

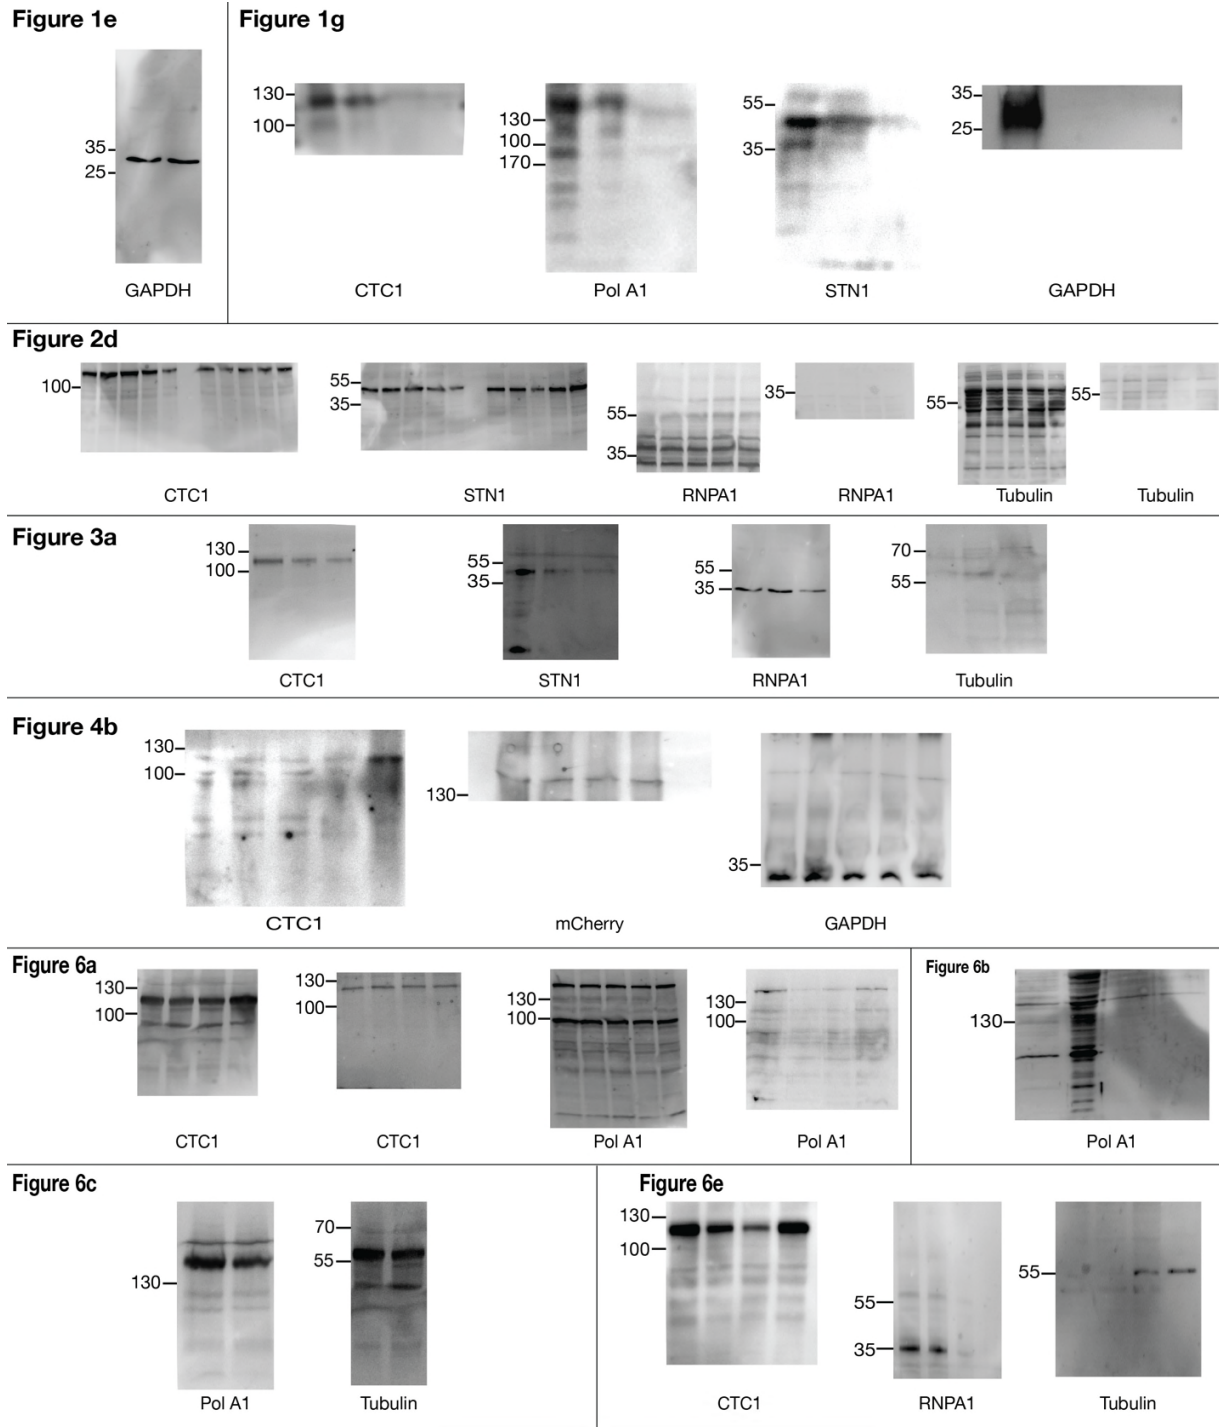

**Supplementary Fig. 13.** Unprocessed western blots. Blots included in the main text are shown as uncropped and unprocessed. All numbers shown represent kDa. Below each image is the target protein probed. Antibodies utilized are listed in the main text Methods section.

CTC1 Cancer-Associated Mutations Within Pol A1 Binding/Nuclear Localization Domain

| Amino Acid # | Reference AA | Replacement AA | Disease                           | Source |
|--------------|--------------|----------------|-----------------------------------|--------|
| 216          | R            | K              | DOID:0070003 / blastoma           | COSMIC |
| 216          | R            | K              | DOID:3571 / liver cancer          | ICGC   |
| 223          | Q            | H              | DOID:11054 / bladder cancer       | TCGA   |
| 223          | Q            | L              | DOID:1324 / lung cancer           | COSMIC |
| 225          | N            | K              | DOID:3571 / liver cancer          | ICGC   |
| 227          | A            | P              | DOID:1324 / lung cancer           | COSMIC |
| 228          | G            | R              | DOID:363 / uterine cancer         | TCGA   |
| 233          | L            | F              | DOID:1324 / lung cancer           | COSMIC |
| 241          | Q            | H              | DOID:363 / uterine cancer         | TCGA   |
| 245          | F            | L              | DOID:3571 / liver cancer          | ICGC   |
| 249          | L            | H              | DOID:363 / uterine cancer         | TCGA   |
| 253          | H            | Q              | DOID:3571 / liver cancer          | ICGC   |
| 253          | H            | Y              | DOID:9256 / colorectal cancer     | ICGC   |
| 254          | P            | Q              | DOID:3571 / liver cancer          | ICGC   |
| 259          | V            | G              | DOID:1324 / lung cancer           | COSMIC |
| 263          | V            | M              | DOID:10534 / stomach cancer       | COSMIC |
| 263          | V            | M              | DOID:11934 / head and neck cancer | TCGA   |
| 264          | Q            | L              | DOID:1324 / lung cancer           | COSMIC |
| 267          | A            | V              | DOID:363 / uterine cancer         | TCGA   |
| 270          | V            | A              | DOID:363 / uterine cancer         | TCGA   |
| 272          | H            | Q              | DOID:3963 / thyroid carcinoma     | COSMIC |
| 276          | R            | W              | DOID:1909 / melanoma              | TCGA   |
| 285          | E            | K              | DOID:0070003 / blastoma           | COSMIC |
| 285          | E            | K              | DOID:3571 / liver cancer          | ICGC   |
| 295          | R            | H              | DOID:2994 / germ cell cancer      | COSMIC |
| 295          | R            | H              | DOID:2394 / ovarian cancer        | TCGA   |
| 316          | Q            | L              | DOID:1324 / lung cancer           | TCGA   |
| 317          | E            | K              | DOID:5041 / esophageal cancer     | ICGC   |
| 319          | E            | K              | DOID:1909 / melanoma              | TCGA   |
| 330          | D            | A              | DOID:11054 / bladder cancer       | ICGC   |
| 216          | R            | K              | DOID:0070003 / blastoma           | COSMIC |
| 216          | R            | K              | DOID:3571 / liver cancer          | ICGC   |
| 223          | Q            | H              | DOID:11054 / bladder cancer       | TCGA   |
| 223          | Q            | L              | DOID:1324 / lung cancer           | COSMIC |
| 225          | N            | K              | DOID:3571 / liver cancer          | ICGC   |
| 227          | A            | P              | DOID:1324 / lung cancer           | COSMIC |
| 228          | G            | R              | DOID:363 / uterine cancer         | TCGA   |
| 233          | L            | F              | DOID:1324 / lung cancer           | COSMIC |
| 241          | Q            | H              | DOID:363 / uterine cancer         | TCGA   |
| 245          | F            | L              | DOID:3571 / liver cancer          | ICGC   |
| 249          | L            | H              | DOID:363 / uterine cancer         | TCGA   |
| 253          | H            | Q              | DOID:3571 / liver cancer          | ICGC   |

**Supplementary Table 1.** Cancer-associated mutations within CTC1 and Pol A1

| CTC1 Telomere Syndrome-Associated Mutations Within Pol A1/Nuclear Import Domain |              |                |                                                |                        |
|---------------------------------------------------------------------------------|--------------|----------------|------------------------------------------------|------------------------|
| Amino Acid #                                                                    | Reference AA | Replacement AA | Disease                                        | Source                 |
| 227                                                                             | A            | V              | cerebroretinal microangiopathy                 | Polvi, et al, 2012     |
| 241                                                                             | G            | Stop           | Coats plus                                     | Anderson et al, 2012   |
| 241                                                                             | G            | Stop           | dyskeratosis congenita                         | Walne et al, 2013      |
| 242                                                                             | K            | L Frame shift  | Coats plus                                     | Anderson et al, 2012   |
| 242                                                                             | K            | L Frame shift  | cerebroretinal microangiopathy                 | Polvi et al, 2012      |
| 242                                                                             | K            | L Frame shift  | Dyskeratosis Congenita                         | Keller et al, 2012     |
| 242                                                                             | K            | L Frame shift  | dyskeratosis congenita                         | Walne et al, 2013      |
| 247                                                                             | L            | P              | dyskeratosis congenita                         | Walne et al, 2013      |
| 259                                                                             | V            | M              | Coats plus                                     | Anderson et al, 2012   |
| 259                                                                             | V            | M              | Norrie disease, cerebroretinal microangiopathy | Romaniello et al, 2012 |
| 278                                                                             | G            | V              | dyskeratosis congenita                         | Walne et al, 2013      |
| 278                                                                             | G            | V              | Coats plus                                     | Bisserbe et al, 2015   |
| 281                                                                             | Y            | H              | Coats plus                                     | Bisserbe et al, 2015   |
| 287                                                                             | R            | Stop           | Coats plus                                     | Anderson et al,2012    |

**Supplementary Table 2.** Telomere Syndrome-Associated Mutations within CTC1

### Supplementary References

- 1 Grbeša, I. *et al.* Mutations in S-adenosylhomocysteine hydrolase (AHCY) affect its nucleocytoplasmic distribution and capability to interact with S-adenosylhomocysteine hydrolase-like 1 protein. *European journal of cell biology* **96**, 579-590 (2017).
- 2 Schacke, M. *et al.* PARP-1/2 Inhibitor Olaparib Prevents or Partially Reverts EMT Induced by TGF- $\beta$  in NMuMG Cells. *International journal of molecular sciences* **20**, 518 (2019).
- 3 Xu, D. *et al.* LocNES: a computational tool for locating classical NESs in CRM1 cargo proteins. *Bioinformatics* **31**, 1357-1365 (2015).
