# Supplementary material for: Pol α-primase dependent nuclear localization of the mammalian CST complex
Source: PubMed Central journal article supplement (PMC7969954; doi:10.1038/s42003-021-01845-4), 2021-03-17
Supplement: 42003_2021_1845_MOESM2_ESM.pdf [file 42003_2021_1845_MOESM2_ESM.pdf]

## **Description of Additional Supplementary Files**

**File Name:** Supplementary Data 1

**Description:** Supplementary Data 1 contains data corresponding to the figures Fig. 1h, Fig. 2b, Fig. 2c, Fig. 3b-d, Fig. 4c-f.and Fig. 6c and f.
