# Supplementary material for: Pol α-primase dependent nuclear localization of the mammalian CST complex
Source: PubMed Central journal article supplement (PMC7969954; doi:10.1038/s42003-021-01845-4), 2021-03-17
Supplement: 42003_2021_1845_MOESM4_ESM.pdf [file 42003_2021_1845_MOESM4_ESM.pdf]

## Reporting Summary

Nature Research wishes to improve the reproducibility of the work that we publish. This form provides structure for consistency and transparency in reporting. For further information on Nature Research policies, see our [Editorial Policies](#) and the [Editorial Policy Checklist](#).

### Statistics

For all statistical analyses, confirm that the following items are present in the figure legend, table legend, main text, or Methods section.

n/a Confirmed

- The exact sample size ( $n$ ) for each experimental group/condition, given as a discrete number and unit of measurement
- A statement on whether measurements were taken from distinct samples or whether the same sample was measured repeatedly
- The statistical test(s) used AND whether they are one- or two-sided  
*Only common tests should be described solely by name; describe more complex techniques in the Methods section.*
- A description of all covariates tested
- A description of any assumptions or corrections, such as tests of normality and adjustment for multiple comparisons
- A full description of the statistical parameters including central tendency (e.g. means) or other basic estimates (e.g. regression coefficient) AND variation (e.g. standard deviation) or associated estimates of uncertainty (e.g. confidence intervals)
- For null hypothesis testing, the test statistic (e.g.  $F$ ,  $t$ ,  $r$ ) with confidence intervals, effect sizes, degrees of freedom and  $P$  value noted  
*Give  $P$  values as exact values whenever suitable.*
- For Bayesian analysis, information on the choice of priors and Markov chain Monte Carlo settings
- For hierarchical and complex designs, identification of the appropriate level for tests and full reporting of outcomes
- Estimates of effect sizes (e.g. Cohen's  $d$ , Pearson's  $r$ ), indicating how they were calculated

*Our web collection on [statistics for biologists](#) contains articles on many of the points above.*

### Software and code

Policy information about [availability of computer code](#)

Data collection N/A

Data analysis Intensity\_Ratio\_Nuclei\_Cytoplasm.ijm2,3 was utilized for nuclear/cytoplasmic ratio analysis

For manuscripts utilizing custom algorithms or software that are central to the research but not yet described in published literature, software must be made available to editors and reviewers. We strongly encourage code deposition in a community repository (e.g. GitHub). See the Nature Research [guidelines for submitting code & software](#) for further information.

### Data

Policy information about [availability of data](#)

All manuscripts must include a [data availability statement](#). This statement should provide the following information, where applicable:

- Accession codes, unique identifiers, or web links for publicly available datasets
- A list of figures that have associated raw data
- A description of any restrictions on data availability

All data generated or analyzed during this study are included in this published article (and its supplementary information files) or available upon reasonable request.

# Life sciences study design

All studies must disclose on these points even when the disclosure is negative.

|                 |                                                                                                                                                                                  |
|-----------------|----------------------------------------------------------------------------------------------------------------------------------------------------------------------------------|
| Sample size     | Sample sizes were selected to ensure statistical significance and in agreement with published data. Sample sizes are shown in figure legends and as individual points on graphs. |
| Data exclusions | N/A                                                                                                                                                                              |
| Replication     | Each experiment was done in triplicate or more                                                                                                                                   |
| Randomization   | Controls were used when necessary                                                                                                                                                |
| Blinding        | N/A                                                                                                                                                                              |

# Reporting for specific materials, systems and methods

We require information from authors about some types of materials, experimental systems and methods used in many studies. Here, indicate whether each material, system or method listed is relevant to your study. If you are not sure if a list item applies to your research, read the appropriate section before selecting a response.

## Materials & experimental systems

## Methods

| n/a                                 | Involvement in the study                                  |
|-------------------------------------|-----------------------------------------------------------|
| <input type="checkbox"/>            | <input checked="" type="checkbox"/> Antibodies            |
| <input type="checkbox"/>            | <input checked="" type="checkbox"/> Eukaryotic cell lines |
| <input checked="" type="checkbox"/> | <input type="checkbox"/> Palaeontology and archaeology    |
| <input checked="" type="checkbox"/> | <input type="checkbox"/> Animals and other organisms      |
| <input checked="" type="checkbox"/> | <input type="checkbox"/> Human research participants      |
| <input checked="" type="checkbox"/> | <input type="checkbox"/> Clinical data                    |
| <input checked="" type="checkbox"/> | <input type="checkbox"/> Dual use research of concern     |

| n/a                                 | Involvement in the study                           |
|-------------------------------------|----------------------------------------------------|
| <input checked="" type="checkbox"/> | <input type="checkbox"/> ChIP-seq                  |
| <input type="checkbox"/>            | <input checked="" type="checkbox"/> Flow cytometry |
| <input checked="" type="checkbox"/> | <input type="checkbox"/> MRI-based neuroimaging    |

## Antibodies

|                 |                                                                                                                                                    |
|-----------------|----------------------------------------------------------------------------------------------------------------------------------------------------|
| Antibodies used | In depth details regarding every single antibody used in this study can be found in the methods section of the manuscript                          |
| Validation      | The effectiveness of each antibody was tested via Knockdown experiments and western blotting analysis and have been used in published manuscripts. |

## Eukaryotic cell lines

Policy information about [cell lines](#)

|                                                                      |                                                                           |
|----------------------------------------------------------------------|---------------------------------------------------------------------------|
| Cell line source(s)                                                  | HEK293T, ATCC® CRL-3216™                                                  |
| Authentication                                                       | All cell lines were obtained from American Type Culture Collection (ATCC) |
| Mycoplasma contamination                                             | All cell lines are tested for Mycoplasma contamination before use         |
| Commonly misidentified lines<br>(See <a href="#">ICLAC</a> register) | N/A                                                                       |

## Flow Cytometry

### Plots

Confirm that:

- The axis labels state the marker and fluorochrome used (e.g. CD4-FITC).
- The axis scales are clearly visible. Include numbers along axes only for bottom left plot of group (a 'group' is an analysis of identical markers).
- All plots are contour plots with outliers or pseudocolor plots.
- A numerical value for number of cells or percentage (with statistics) is provided.

## Methodology

|                           |                                                                                                                                                                                                                                                                                                                                                                                                  |
|---------------------------|--------------------------------------------------------------------------------------------------------------------------------------------------------------------------------------------------------------------------------------------------------------------------------------------------------------------------------------------------------------------------------------------------|
| Sample preparation        | All samples were fixed in 70% ethanol at room temperature after first being washed twice with PBS. Cells were then stained with propidium iodide according to the Cold Spring Harbor Protocol ( <a href="https://www.biolegend.com/en-us/protocols/propidium-iodide-cell-cycle-staining-protocol">https://www.biolegend.com/en-us/protocols/propidium-iodide-cell-cycle-staining-protocol</a> ). |
| Instrument                | LSRII-14 color and MofloAstrios                                                                                                                                                                                                                                                                                                                                                                  |
| Software                  | FloJo                                                                                                                                                                                                                                                                                                                                                                                            |
| Cell population abundance | Cells deemed apoptotic/necrotic were excluded from analysis. mCherry expressing cells were deemed to be over 80% for mCherry based sorts and this number reaches 100% for propidium iodide stained cells. >10,000 cells were used for all plots shown.                                                                                                                                           |
| Gating strategy           | Negative (unstained cells) were utilized as negative controls to establish proper gating. All gating strategies were uniform for all included analysis. Doublet discrimination was performed by plotting FSC-H vs FSC-A and Propidium iodide signal was utilized to sort for living healthy cells.                                                                                               |

Tick this box to confirm that a figure exemplifying the gating strategy is provided in the Supplementary Information.
